# Supplementary material
Source: PubMed Central journal article supplement (PMC3427131)
Supplement: 1205399109_pnas.201205399SI.pdf [file 1205399109_pnas.201205399SI.pdf]

# Supporting Information

Kummer et al. 10.1073/pnas.1205399109

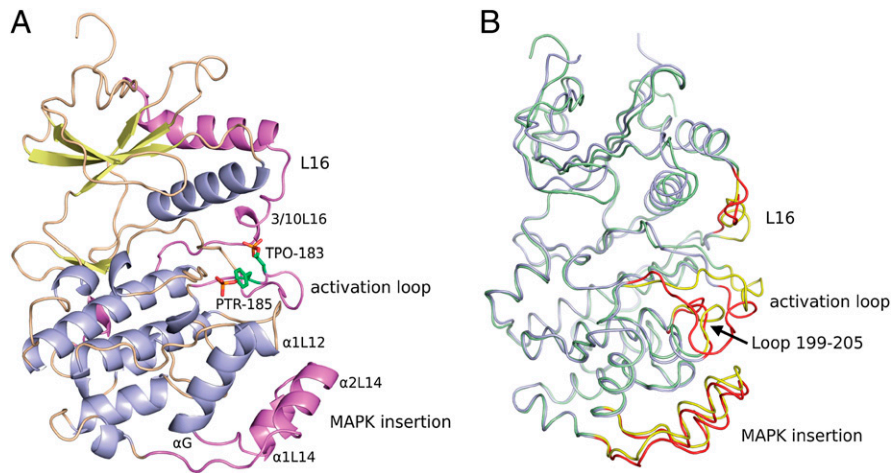

**Fig. S1.** Topology and structural comparison of extracellular signal-regulated kinase 2 (ERK2) and doubly phosphorylated ERK2. (A) Ribbon diagram of phosphorylated ERK2 (pERK2) [Protein Data Bank (PDB) ID 2ERK]. Structural segments of ERK2/pERK2 that are implicated in binding of designed ankyrin repeat proteins (DARPin)s E40 to ERK2 and pE59 to pERK2 contain the activation loop, the mitogen-activated protein kinase (MAPK) insertion,  $\alpha$ 1L12, and  $\alpha$ G. Regions unique to MAP kinases are indicated in magenta. The side chains of pThr-183 (TPO-183) and pTyr-185 (PTR-185) are indicated. (B) A superposition of ERK2 (PDB ID 1ERK, blue) and pERK2 (green) is shown. Segments of structural divergence are highlighted in red (ERK2) and gold (pERK2).

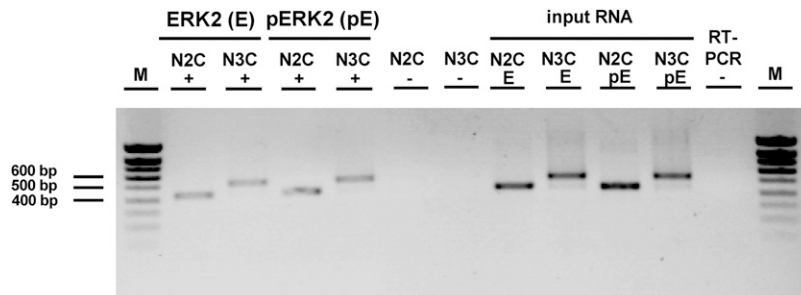

**Fig. S2.** Enrichment and specificity of ribosome display (RD) selections. The outcome of RD was monitored at the level of RT-PCR product yield by agarose gel electrophoresis. The RT-PCR yields of the fourth selection round were compared for the N2C and the N3C library selected against ERK2 and phospho-ERK2 (pERK2) (+). The specificities of selected N2C and N3C pools were checked by panning against neutravidin + BSA (-). The amount and quality of the selection input RNA was verified separately for each selection by RT-PCR amplification. A RT-PCR without RNA added (-) served as a negative control. All RT-PCR reactions yielded products of the expected size.







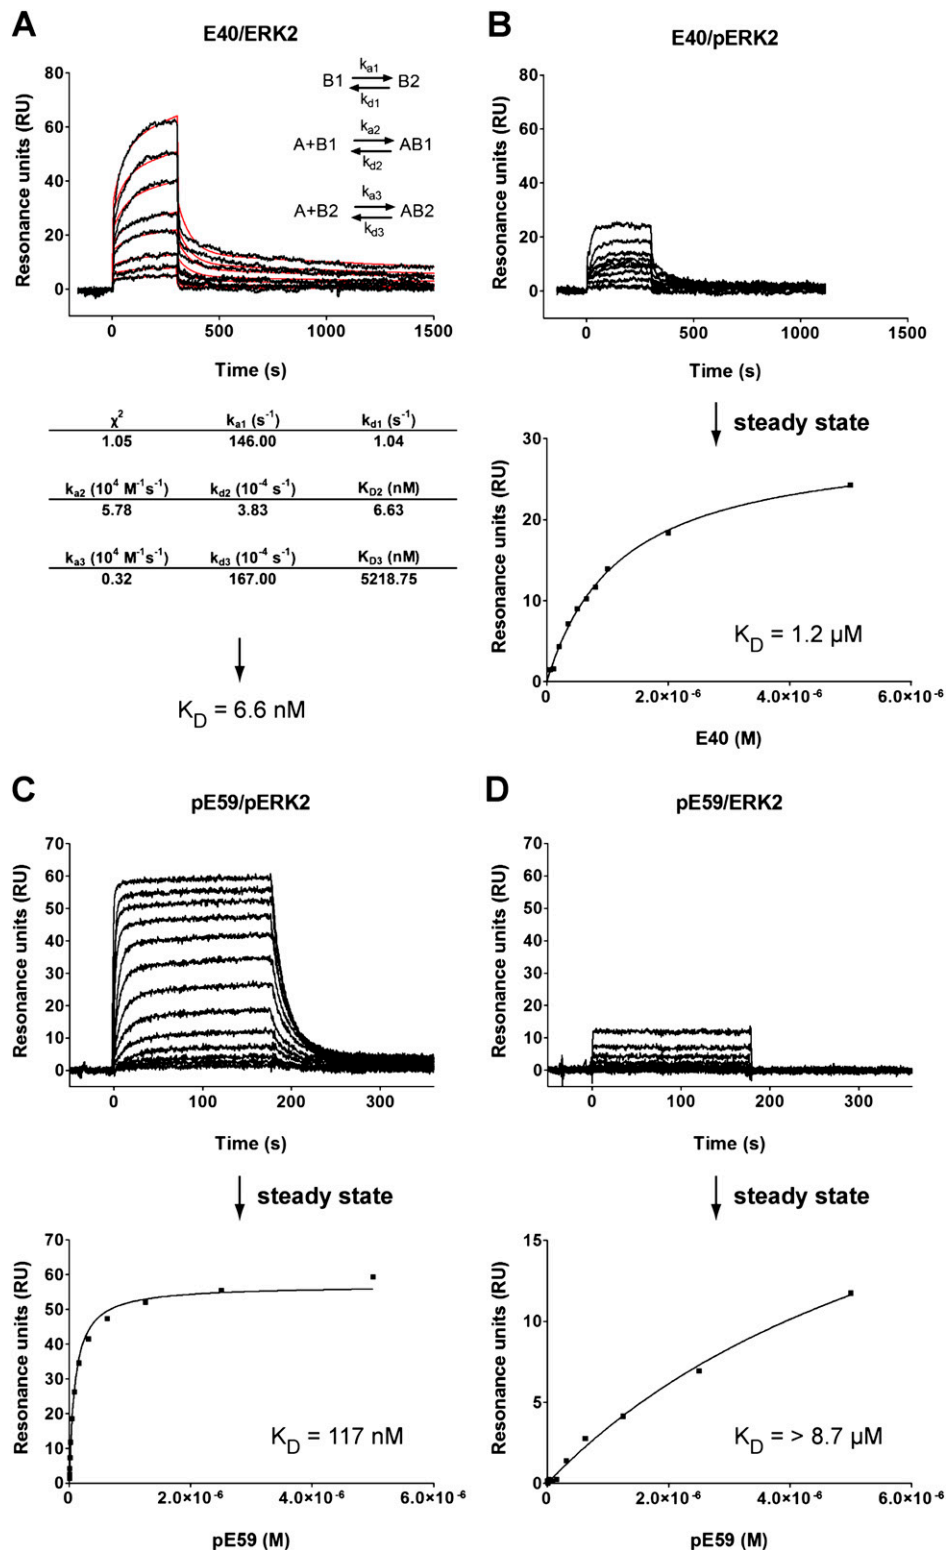

**Fig. S6.** Affinity determination of DARPins E40 and pE59 using surface plasmon resonance (SPR). The binding kinetics of DARPins E40 and pERK2 were monitored using Biacore. ERK2 and pERK2 were immobilized at low concentrations and the response of varied amounts of DARPins was compared with an empty flow cell. Three independent experiments were carried out for each DARPIn/kinase combination. Representative results are depicted. (A) Different concentrations of E40 (25, 50, 100, 200, 300, 400, 500, 650, 1,000, and 2,000 nM) were applied to a flow cell with immobilized ERK2. The global fit using the indicated model is shown in red. Extracted kinetic data are shown accordingly. (B) Binding of E40 (50, 100, 200, 350, 500, 650, 800, 1,000, 2,000, and 5,000 nM) to immobilized pERK2 was analyzed. The  $K_D$  was derived from the equilibrium binding responses. (C and D) Increasing concentrations of pE59 (1.2, 2.4, 4.9, 9.8, 19.5, 39.1, 78.1, 156.3, 312.5, 625, 1,250, 2,500, and 5,000 nM) were applied to flow cells with immobilized pERK2 (C) or ERK2 (D). The data were evaluated by fitting the equilibrium binding responses to obtain affinity values.





**Table S3. List of the major interaction contacts in the pE59/pERK2 complex**

| pE59 interaction residue<br>(repeat module)* |                 |         | Chain | H-bond (Å)     | ERK2 interaction residue<br>(structural element)* |                       | Chain |
|----------------------------------------------|-----------------|---------|-------|----------------|---------------------------------------------------|-----------------------|-------|
| ASP                                          | 44              | (1)     | B     | OD2-NZ (3.02)  | LYS                                               | 229                   | A     |
| ASP                                          | 46 <sup>†</sup> | (1)     | B     | OD2-NZ (2.34)  | LYS                                               | 229                   | A     |
| GLN                                          | 56 <sup>†</sup> | (1)     | B     | NE2-O (2.98)   | ARG                                               | 189 (activation loop) | A     |
| GLN                                          | 56 <sup>†</sup> | (1)     | B     |                | LYS                                               | 229                   | A     |
| GLN                                          | 56 <sup>†</sup> | (1)     | B     | OD2-NE2 (2.76) | HIS                                               | 230                   | A     |
| ASP                                          | 77              | (2)     | B     |                | HIS                                               | 230                   | A     |
| PHE                                          | 79 <sup>†</sup> | (2)     | B     | NH1-O2P (2.54) | HIS                                               | 230                   | A     |
| PHE                                          | 79 <sup>†</sup> | (2)     | B     |                | LEU                                               | 232 (αG)              | A     |
| PHE                                          | 79 <sup>†</sup> | (2)     | B     | O-NZ (2.89)    | ASP                                               | 233 (αG)              | A     |
| ILE                                          | 81 <sup>†</sup> | (2)     | B     |                | TYR                                               | 231 (αG)              | A     |
| LEU                                          | 86              | (2)     | B     | OD2-OH (2.25)  | HIS                                               | 230                   | A     |
| ILE                                          | 89 <sup>†</sup> | (2)     | B     |                | PTR                                               | 185 (activation loop) | A     |
| ILE                                          | 89 <sup>†</sup> | (2)     | B     | NH1-O2P (2.54) | TYR                                               | 231 (αG)              | A     |
| ARG                                          | 90 <sup>†</sup> | (2)     | B     |                | PTR                                               | 185 (activation loop) | A     |
| ARG                                          | 90 <sup>†</sup> | (2)     | B     | OD2-OH (2.25)  | ARG                                               | 189 (activation loop) | A     |
| ASP                                          | 110             | (C-cap) | B     |                | TYR                                               | 231 (αG)              | A     |
| ASP                                          | 110             | (C-cap) | B     | O-NZ (2.89)    | LEU                                               | 232 (αG)              | A     |
| LYS                                          | 111             | (C-cap) | B     |                | TYR                                               | 261 (α2L14)           | A     |
| PHE                                          | 112             | (C-cap) | B     | OD2-OH (2.54)  | ALA                                               | 258                   | A     |
| PHE                                          | 112             | (C-cap) | B     |                | TYR                                               | 261 (α2L14)           | A     |
| ILE                                          | 121             | (C-cap) | B     | OD2-NZ (2.44)  | LYS                                               | 201                   | A     |
| ASP                                          | 122             | (C-cap) | B     |                | GLU                                               | 184 (activation loop) | A     |
| ASP                                          | 122             | (C-cap) | B     | OD2-NZ (2.44)  | LYS                                               | 201                   | A     |
| ASP                                          | 44              | (1)     | D     |                | LYS                                               | 229                   | C     |
| GLU                                          | 45 <sup>†</sup> | (1)     | D     | OE2-NZ (3.02)  | LYS                                               | 229                   | C     |
| ASP                                          | 46 <sup>†</sup> | (1)     | D     | OD2-NZ (2.44)  | LYS                                               | 229                   | C     |
| LEU                                          | 48 <sup>†</sup> | (1)     | D     | NE2-O (3.08)   | LYS                                               | 229                   | C     |
| GLN                                          | 56 <sup>†</sup> | (1)     | D     |                | ARG                                               | 189 (activation loop) | C     |
| GLN                                          | 56 <sup>†</sup> | (1)     | D     | OD2-NE2 (2.78) | LYS                                               | 229                   | C     |
| ASP                                          | 77              | (2)     | D     |                | HIS                                               | 230                   | C     |
| PHE                                          | 79 <sup>†</sup> | (2)     | D     | NH2-O2P (2.64) | HIS                                               | 230                   | C     |
| PHE                                          | 79 <sup>†</sup> | (2)     | D     |                | LEU                                               | 232 (αG)              | C     |
| PHE                                          | 79 <sup>†</sup> | (2)     | D     | OD2-OH (2.54)  | ASP                                               | 233 (αG)              | C     |
| ILE                                          | 81 <sup>†</sup> | (2)     | D     |                | HIS                                               | 230                   | C     |
| ILE                                          | 81 <sup>†</sup> | (2)     | D     | OD2-OH (2.54)  | TYR                                               | 231 (αG)              | C     |
| ILE                                          | 81 <sup>†</sup> | (2)     | D     |                | LEU                                               | 232 (αG)              | C     |
| ILE                                          | 89 <sup>†</sup> | (2)     | D     | NH2-O2P (2.64) | PTR                                               | 185 (activation loop) | C     |
| ILE                                          | 89 <sup>†</sup> | (2)     | D     |                | TYR                                               | 231 (αG)              | C     |
| ARG                                          | 90 <sup>†</sup> | (2)     | D     | OD2-OH (2.54)  | PTR                                               | 185 (activation loop) | C     |
| ARG                                          | 90 <sup>†</sup> | (2)     | D     |                | ARG                                               | 189 (activation loop) | C     |
| ASP                                          | 110             | (C-cap) | D     | OD2-OH (2.54)  | TYR                                               | 231 (αG)              | C     |
| ASP                                          | 110             | (C-cap) | D     |                | LEU                                               | 232 (αG)              | C     |
| LYS                                          | 111             | (C-cap) | D     | OD2-NZ (3.52)  | TYR                                               | 261 (α2L14)           | C     |
| PHE                                          | 112             | (C-cap) | D     |                | LEU                                               | 198 (α1L12)           | C     |
| PHE                                          | 112             | (C-cap) | D     | OD2-NZ (3.52)  | TYR                                               | 231 (αG)              | C     |
| PHE                                          | 112             | (C-cap) | D     |                | LEU                                               | 232 (αG)              | C     |
| PHE                                          | 112             | (C-cap) | D     | OD2-NZ (3.52)  | LYS                                               | 257 (α2L14)           | C     |
| PHE                                          | 112             | (C-cap) | D     |                | ALA                                               | 258                   | C     |
| PHE                                          | 112             | (C-cap) | D     | OD2-NZ (3.52)  | TYR                                               | 261 (α2L14)           | C     |
| GLY                                          | 113             | (C-cap) | D     |                | LYS                                               | 257 (α2L14)           | C     |
| LYS                                          | 114             | (C-cap) | D     | OD2-NZ (3.52)  | LYS                                               | 257 (α2L14)           | C     |
| LYS                                          | 114             | (C-cap) | D     |                | TYR                                               | 231 (αG)              | C     |
| ASP                                          | 118             | (C-cap) | D     | OD2-NZ (3.52)  | LYS                                               | 257 (α2L14)           | C     |
| ASP                                          | 122             | (C-cap) | D     |                | GLU                                               | 184 (activation loop) | C     |
| ASP                                          | 122             | (C-cap) | D     | LYS            | 201                                               | C                     |       |

\*A cutoff of 4 Å was applied for interactions.

<sup>†</sup>Amino acids are located in a randomized library position of pE59.
